# Supplementary material
Source: PubMed Central journal article supplement (PMC3121811)
Supplement: 1105937108_sapp.pdf [file 1105937108_sapp.pdf]

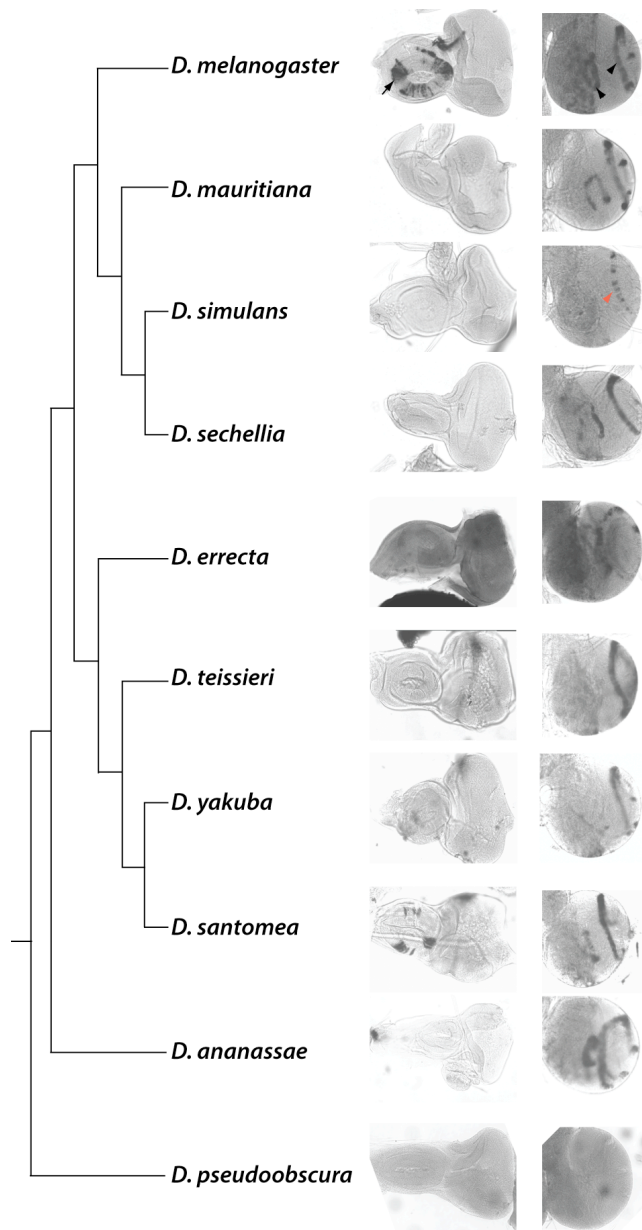

**Figure S1. Rapid evolution of *Obp99a* expression patterns in the optic lobe and eye-antennal disc of *Drosophila* species.** In the third larval instar antennal disc of *D. melanogaster*, *Obp99a* is expressed in a species-specific manner in the Johnston's organ (black arrow). In the optic lobe, expression is observed in cells of both the outer and inner proliferation centers of most species (black arrowheads in *D. melanogaster*). However, in *D. simulans*, *Obp99a* is expressed in much less elaborate pattern in the optic lobe (red arrowhead).

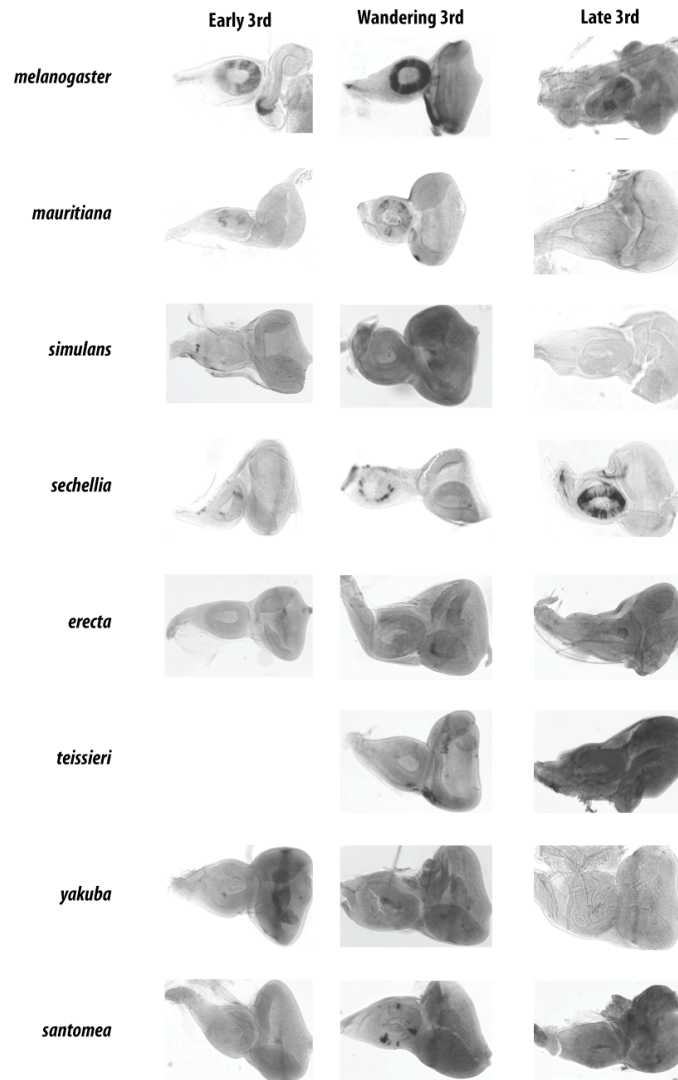

**Figure S2. Timecourse of *Obp99a* expression during eye-antennal disc development.** Eye-antennal discs were collected from early, mid (wandering), and late third instars, and hybridized to an *Obp99a* probe. The pattern observed in *D. melanogaster* wandering stage antenna was observed in late third instar for *D. sechellia*. A much weaker pattern was observed in in *D. mauritiana* starting in early third instar. A similar pattern of expression was observed in wandering third instar *D. santomea* eye-antennal discs. The detection of these patterns in more distant species, and at differing timepoints highlights the importance of temporal resolution and species coverage when seeking to identify novel patterns of expression.

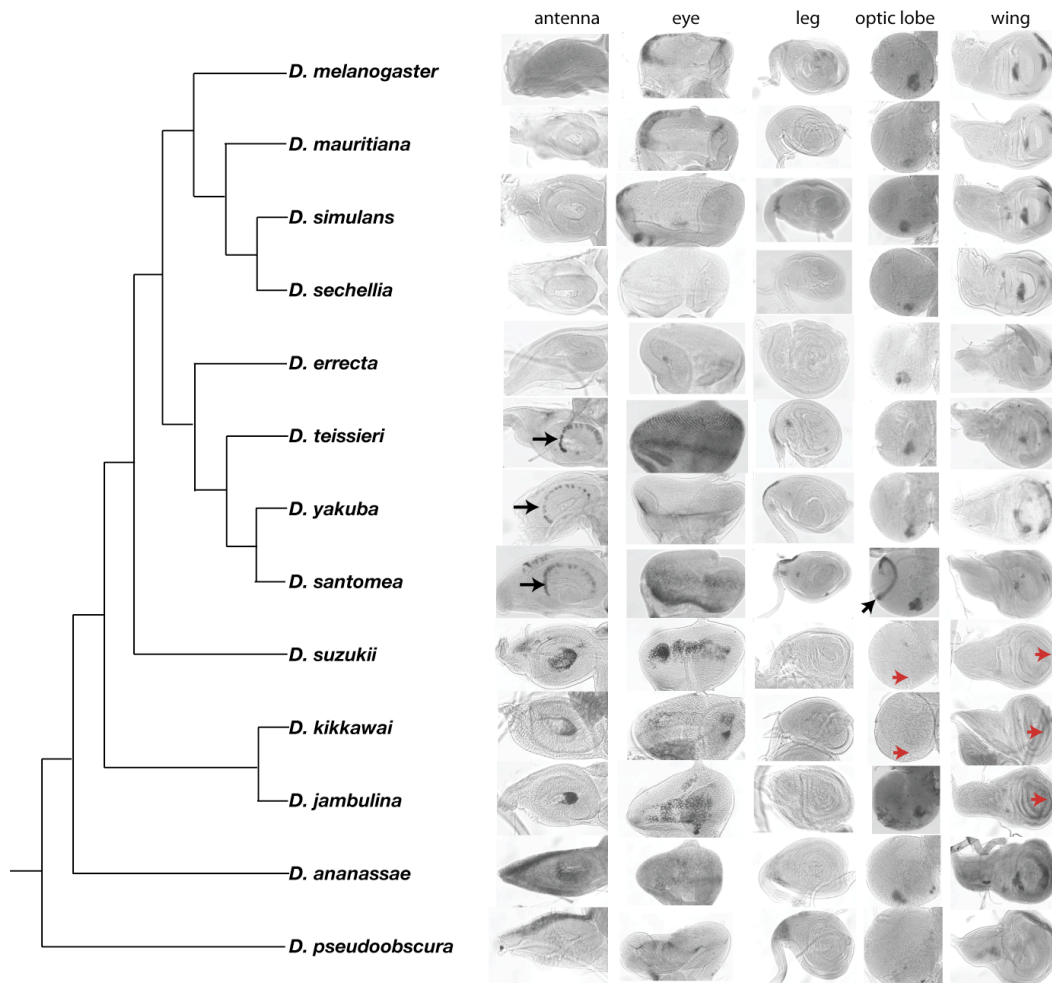

**Figure S3. Rapid divergence in *Nep1* expression among *Drosophila* species.** In a comparison of imaginal disc gene expression among thirteen *Drosophila* species, multiple cases of shifting patterns, pattern loss and apparent gains were observed. Patterns of expression were found to vary widely in spatial extent within the antennal, eye, leg and wing disc. Losses of expression were evident in the mushroom body of the CNS of *D. suzukii* and *D. kikkawai* (red arrows in the “optic lobes” column). These species also appear to have lost expression in the wing hinge region (red arrows in the “wing” column). In the *D. yakuba* clade, two apparent gains were observed. In the antennal discs of *D. teissieri*, *D. yakuba*, and *D. santomea*, expression was observed in sensory organ precursors of the third antennal segment (black arrows in “eye” column). In *D. santomea*, a novel pattern of expression was observed in laminar neuroblasts of the developing visual system (black arrow in “optic lobe” column).

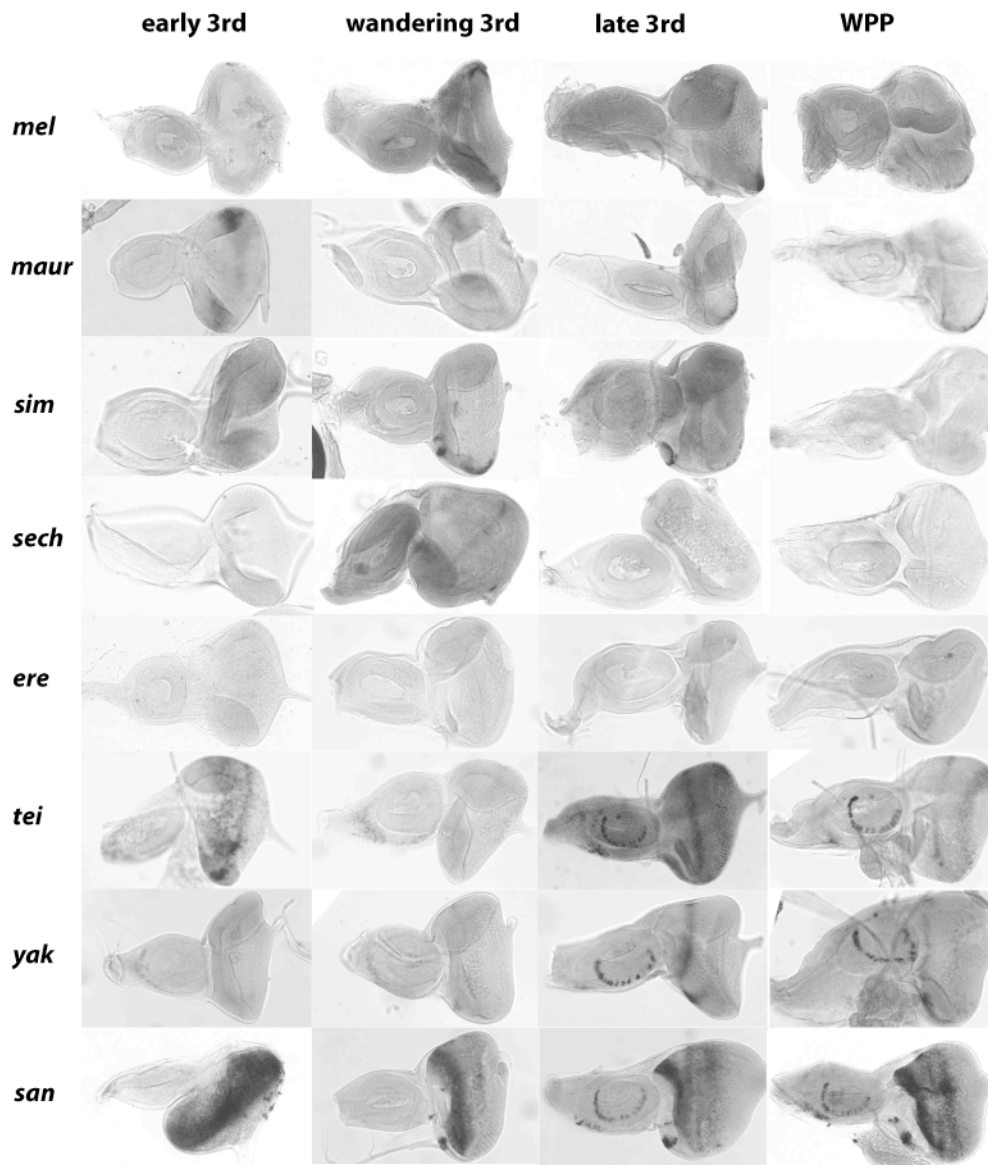

**Figure S4. Time course of *Nep1* expression in eye-antennal discs.** From early in the third instar, *D. santomea* exhibits robust expression of *Nep1* in the region anterior to the morphogenetic furrow fated to become the frons. In *D. yakuba*, *D. santomea*, and *D. teissieri*, a unique pattern of expression is observed in the sensory organ precursors of the third antennal segment, late in the third instar. None of the other species examined show this pattern in any of the stages tested.



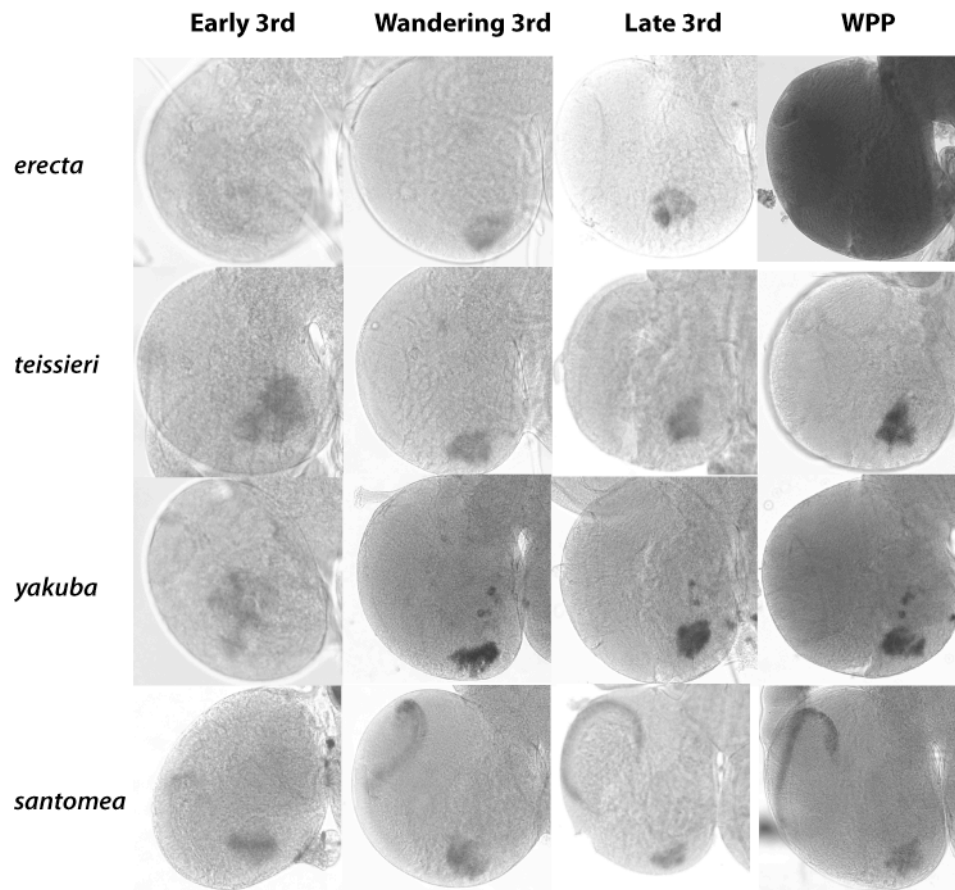

**Figure S5. Timecourse of *Nep1* expression in larval optic lobes.** Optic lobes from four developmental stages were tested for laminar neuroblast expression. From mid third instar, and into early pupal stages, only *D.santomea* expresses *Nep1* in the laminar neuroblasts.

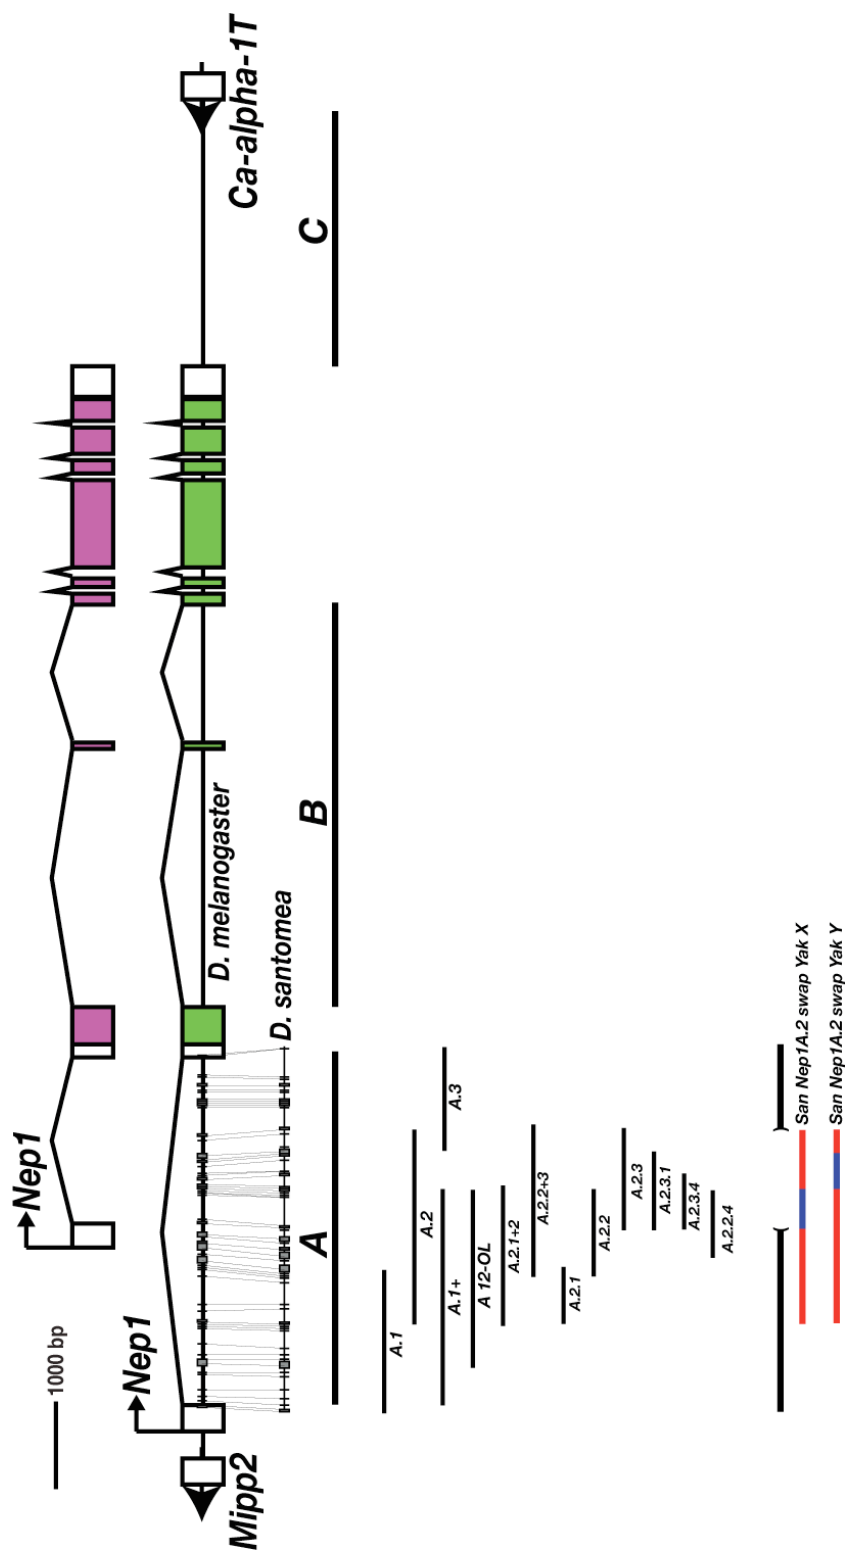

**Figure S6. *Nep1* reporter constructs.** Fragments were amplified by PCR using the primers listed for each construct in Table S3, and inserted into the pS3AG vector containing an Hsp70 TATA box and enhanced nuclear GFP reporter gene.

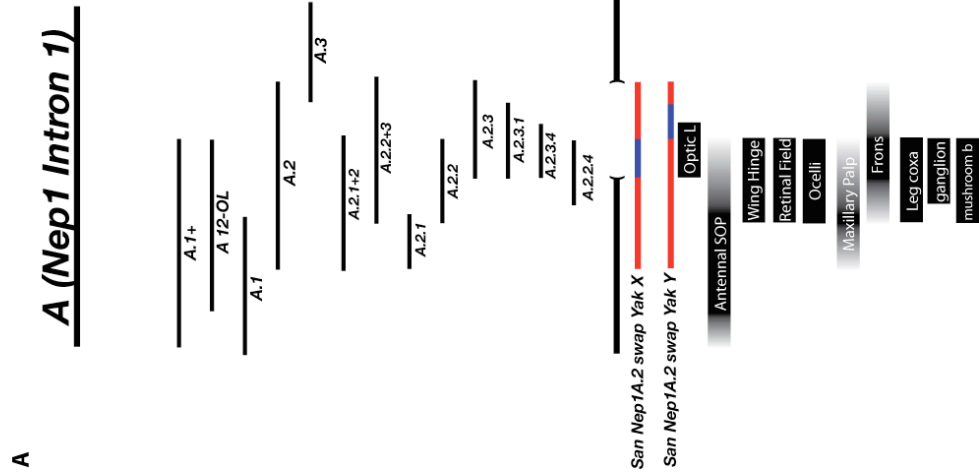

**B**

| Construct | Optic Lobe (Laminar nb) | Antenna (SOPs) | Wing Hinge | Retina I Field | Ocelli Palp | Maxillary Palp | Frons | Leg (cx) | CNS (vg) | CNS (mb) | Wing (ad, ectopic) | Leg joints (ectopic) |
|-----------|-------------------------|----------------|------------|----------------|-------------|----------------|-------|----------|----------|----------|--------------------|----------------------|
| A         | +                       | +(Yak)         | +          | +              | +           | +              | +     | +        | +        | +        | +                  | +                    |
| B         | -                       | -              | -          | -              | -           | -              | -     | -        | -        | +/-      | -                  | -                    |
| C         | -                       | -              | -          | -              | -           | -              | -     | -        | -        | -        | -                  | -                    |
| A.1+      | -                       | +(Yak)         | ND         | +              | +           | -              | -     | ND       | ND       | ND       | ND                 | ND                   |
| A12-OL    | -                       | -              | -          | +              | +           | -              | -     | +        | +        | +        | +                  | +                    |
| A.1       | -                       | -              | -          | -              | -           | -              | -     | -        | -        | -        | -                  | -                    |
| A.2       | +                       | -              | -          | +              | +           | +              | +     | +        | +        | +        | +                  | +                    |
| A.3       | -                       | -              | -          | -              | -           | -              | -     | -        | -        | -        | -                  | -                    |
| A.2.1+2   | -                       | -              | -          | +              | +           | +              | -     | ND       | +        | +        | +/-                | ND                   |
| A.2.2+3   | +                       | -              | ND         | +              | +           | -              | +     | ND       | ND       | ND       | +/-                | ND                   |
| A.2.1     | -                       | -              | -          | -              | -           | -              | -     | -        | -        | -        | -                  | -                    |
| A.2.2     | -                       | -              | -          | +              | +           | -              | -     | +        | +        | +        | +/-                | +/-                  |
| A.2.3     | +                       | -              | -          | -              | -           | -              | -     | -        | +/-      | -        | -                  | -                    |
| A.2.3.1   | +                       | -              | -          | -              | -           | -              | -     | -        | +/-      | -        | -                  | -                    |
| A.2.3.4   | +                       | -              | -          | +/-            | -           | -              | -     | -        | +/-      | -        | -                  | -                    |
| A.2.2.4   | -                       | -              | ND         | -              | -           | -              | -     | ND       | +        | -        | ND                 | ND                   |

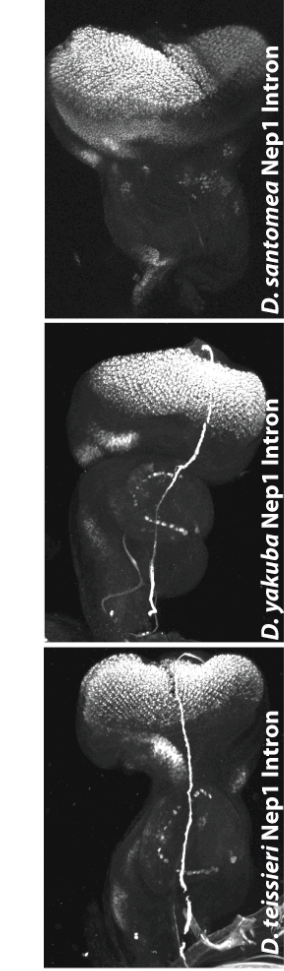

**Fig S7. Nep1 Constructs and expression patterns.** (A) constructs generated from the first intron of *Nep1*. (B) The presence of GFP in a variety of patterns is listed for each construct. (+) denotes the presence of high expression, (-) indicates the absence of detectable expression. (+/-) indicates weak/trace expression and (ND) indicates a pattern that was not determined. The antennal SOP pattern novel to *D. yakuba*, *D. santomea*, and *D. teissieri* was mapped in the context of the *D. yakuba* intron, indicated by "(yak)" in the table. (C) Eye-antennal discs of animals bearing a *Nep1* intron reporter from *D. yakuba*, *D. teissieri*, and *D. santomea*, showing that the *D. santomea* intron lacks antennal SOP activity, likely due to a shift in position of the enhancer.

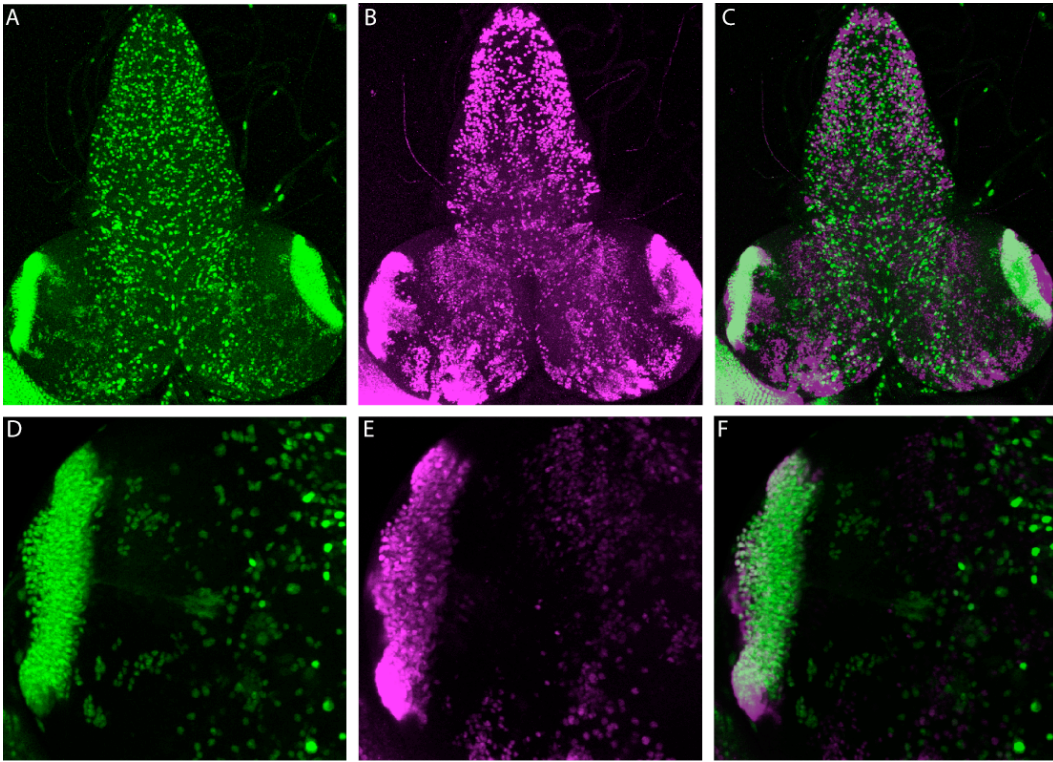

**Figure S8. The optic lobe activity of *Nep1* is restricted to the Dachshund-positive laminar neuroblasts. Larvae expression GFP driven by a 2.2 kb region of the *D. santomea Nep1* intron (A, D) (“A.2” fragment), containing most of the regulatory activities of *Nep1*, were co-stained with the monoclonal antibody to the Dachshund protein (B, E). (C, F) Merged image.**



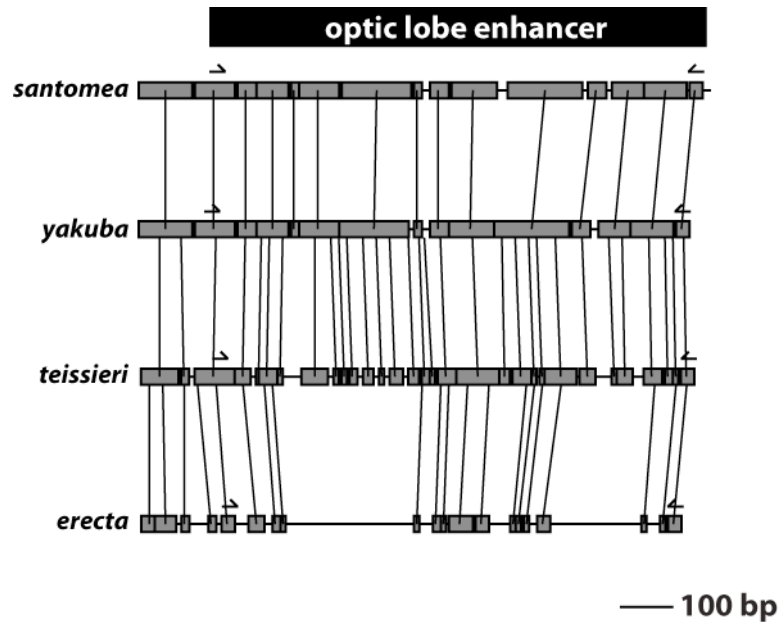

**Figure S9. Visual alignment of the optic lobe enhancer.** *Nep1* intron sequences containing the optic lobe enhancer were compared for regions of exact identity. Gray boxes denote regions of exact identity between the sequences connected by lines. Arrows mark the location of primers used to amplify the optic lobe enhancer from different species. *D. santomea* and *D. yakuba* sequences were compared to each other in the GenePalette tool, generating a pairwise plot of the sequences. *D. teissieri* and *D. erecta* DNA sequences were built into the alignment sequentially (thus, *D. teissieri* has more blocks of conservation than *D. erecta*).

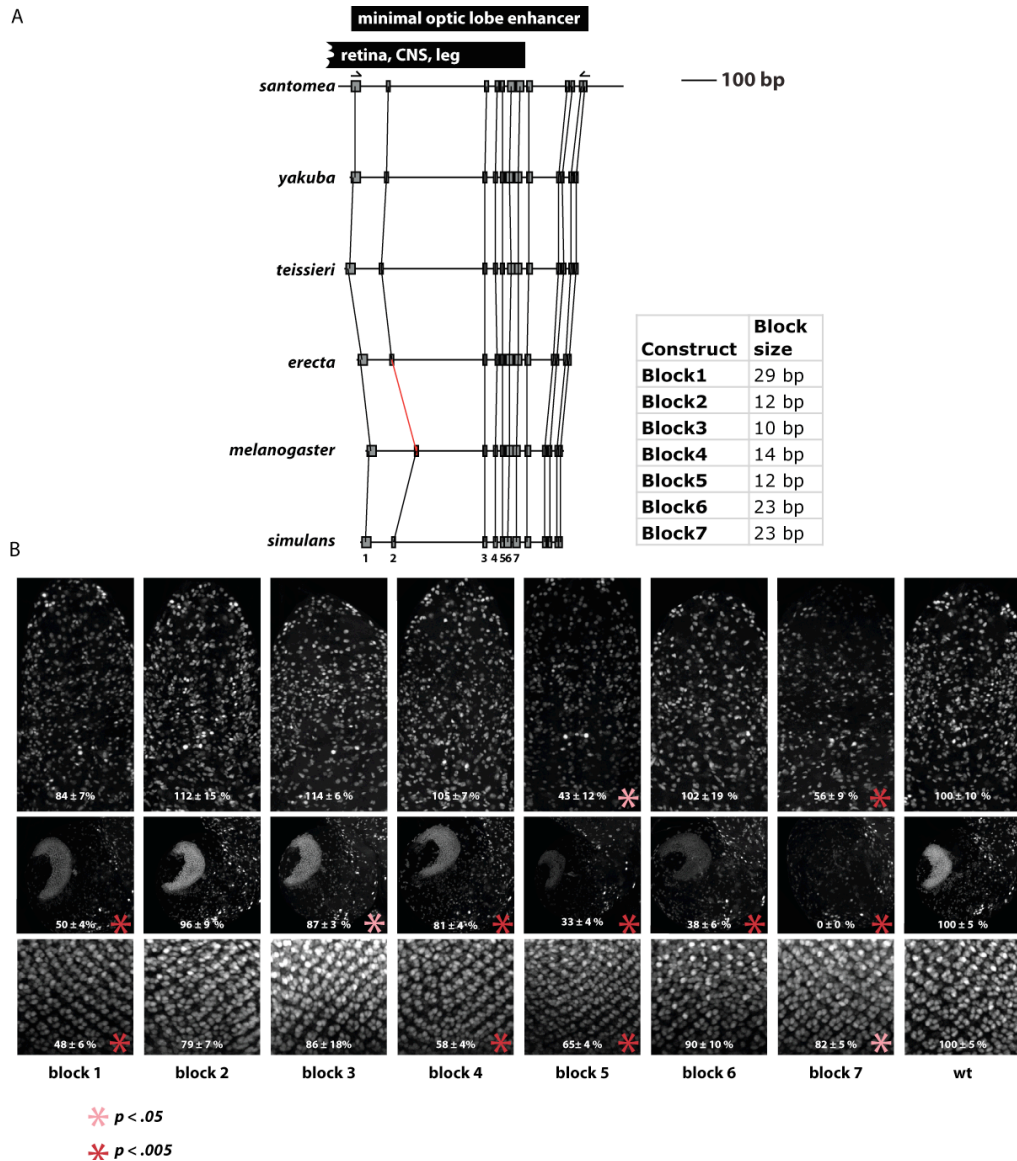

**Figure S10. The optic lobe enhancer shares regulatory inputs with other enhancers.** Mutations that scramble short blocks of sequence conserved from *D. santomea* to *D. melanogaster* in the context of a large fragment of the intron (“A.2” fragment, 2.2 kb) affect multiple enhancer activities residing within the region. (A) Schematic of the position of conserved blocks located in the region of overlap of optic lobe and retina/CNS/frons activities. (B-H) Enhancer activity in the larval CNS (top), optic lobe (middle) and retinal field (bottom) upon scrambling the sequence of each block, visualized by GFP expression. Asterix color indicates level of significance in as t-test.

optic lobe enhancer begin  
 minimal optic lobe enhancer begin

*sanotmea* ACAAACAAAAAGTAATGCACATAAAATATTATACAAAAATTAACAAAAA T CCGGAAAAGTGC S1  
*yakuba* ACAAACAAAAAGTAATGCACATAAAATATTATACAAAAATTAACAAAAA A CCGGAAAAGTGC  
*teissieri* ACAAACAAAAAGTAATGCACATAAAATATTATACAAAAATTAACAAAAA A CCGGAAAAGTGC

*sanotmea* ACAGAAAAGAAATAAGATCATA GAATTTT TGTGTTTTTTTT T GGAAGTATATCGCAGAGGT S2  
*yakuba* ACAGAAAAGAAATAAGATCATA GAATCTT TGTGTTTTTTTT T GGAAGTATATCGCAGAGGT  
*teissieri* ACAGAAAAGAAATAAGATCATA AGATCTG TGTGTTTTTTTT - GGAAGTATATCGCAGAGGT

*sanotmea* ATTCCATT A TGGTATTCCAACAC ----- ATCAGT GAGA AACTCGGGATT AAGTT Y1 Y2  
*yakuba* ATTCCATT A TGGTATTCCAACAC ----- ATCAGG GAGA AACTCGGGATT TAGTT  
*teissieri* ATTCCATT G TGGTATTCCAACAC TATCAGTGAA ATCAGT GAGA GACTTTGGATT AAGTT

*sanotmea* CTTGGTGGACTTGACATGTTTTTGATAACAGTGTGAAATATTGATCA ----- GATT  
*yakuba* CTTGGTGGACTTGACATGTTTTTGATAACAGTGTGAAATATTGATCA ----- GATT  
*teissieri* CTTGGTGGACTTGACATGTTTTTGATAACAGTGTGAAATATTGATCA TCTTCATA GATT

*sanotmea* GAGATCA - GATATATTTTTT A CTGTGCAGTAATTGTTGC CAAGTTA TCGCATATCA S3  
*yakuba* GAGATCA - GATATATTTTTT T CTGTGCAGTAATTGTTGC CAAGTTA TCGCATATCA  
*teissieri* GAGATA T T GATATA - TTTTTT T CTGTGCAGTAATTGTTGC A AAGTT T TCGCATATCA

*sanotmea* CAAGATGTATT TTAATGACCA CATATTTATGT GATAC TGAACGATGATCAGATAAAC S4  
*yakuba* CAAGATGTATT TTAATGACCA CATATTTATGT GATAC TGAACGATGATCAGATAAAC  
*teissieri* CAAGATGTATT A TAAATAGCA ATATTTATGT AATA TGAACGATGATCAGATAAAC

*sanotmea* TACTCTT A TACTCGTATGCTAGCCAGAATTACCAAAAT TTTTTT TGCCTGTGC GATTAT Y3  
*yakuba* TACTCTT A TACTCGTATGCTAGCCAGAATTACCAAAAT TTTTTT TGCCTGTGC TATTAT  
*teissieri* TACTCTT A TACTCGAATGCTAGCCAGAATTACCAAAATA TTTTTT - GCCTGTGC GATTAT

*sanotmea* GAATTTCA AAGTTTTGTTAGCTTGTGAACCAGCTGCGGTAGGTAATACGATGCGAAT Y4 Y5  
*yakuba* GAATTTAA AAGTTTTGTTAGCTTGTGAACCAGCTGCGGTAGGCAATACGATGCGAAT  
*teissieri* GAATTTCT AAGTTTTGTTAGCTTGTGAACCAGCTGCGGTAGGTAATACGATGCGAAT

Y Fragment ← X Fragment  
*sanotmea* TTAACGACGGTTCGCATTAATTTATTTAGTTTGTGTGCTCCGTTTCGAGTTTCTTCTCCG  
*yakuba* TTAACGACGGTTCGCATTAATTTATTTAGTTTGTGTGCTCCGTTTCGAGTTTCTTCTCCG  
*teissieri* TTAACGACGGTTCGCATTAATTTATTTAGTTTGTGTGCTCCGTTTCGAGTTTCTTCTCCG

*sanotmea* CTTCCACCA G CACCA GCACCACCACCAGCACCACCACCA CCA C CACCATC C TCATCCTCT  
*yakuba* CTTCCACCA G CACCA ----- CCA C CACCATC C TCATCCTCT  
*teissieri* CTTCCACCA C CACCA ----- CCA T C C T C A T C TCATCCTCT

*sanotmea* TCGCGAAAAATAAATAATTA TGAATAACAA A ACGACTGTATCGAA T T C A C G T G G C T T C A  
*yakuba* TCGCGAAAAATAAATAATTA TGAATAACAA A ACGACTGTATCGAA T T C A C G T G G C T T C A  
*teissieri* TCGCGAAAAATAAATAATTA TGAATAACAA G A G C G A C T G T A T C G A A C T T C A C G T G G C T - C A

minimal optic lobe enhancer end Y6Y7  
*sanotmea* TCGGCAGAAGTGCCCAATTTTGAAAACGATCGCGAGCTGCGAAGAATATTGTGAATTTTG  
*yakuba* TCGGCAGAAGTGCCCAATTTTGAAAACGATCGCGAGCTGCGAAGAATATTGTGAATTTTG  
*teissieri* TCGGCAGAAGTGCCCAATTTTGAAAACGATCGCGAGCTGCGAAGAATATTGTGAATTTTG

*sanotmea* AATATTTAAGTATTCAAGAGCGTACAGAGATT GGTAGCT C FAGATTTCC GATTTGGGCAT Y8 Y9  
*yakuba* AATATTTAAGTATTCAAGAGCGTACAGAGATT GGTAGCT T FAGATTTCC C ATTTGGGCAT  
*teissieri* AATATTTAAGTATTCAAGAGCGTACAGAGATT TGTAGCT C FAGATTTCC G ATTTGGGCAT

*sanotmea* TCGATCTGTATCTGGCATCTG CCACCAGAACTGCCATCGGATCTTTGAT TAAATCAAAT Y10  
*yakuba* TCGATCTGTATCTGGCATCTG CCACCAGAACTGCCATCGGATCTTTGAT A A A A T C A A A T  
*teissieri* TCGATCTGTATCTG ----- CCACCAGAACTGCCATCGGATCTTTGAT T A A A T C A A A T

*sanotmea* TAAATGAAATCGGCTTGGAGACAGTATATAGACGAGATATA GC CCGCTGCCTTCGTCCGG  
*yakuba* TAAATGAAATCGGCTTGGAGACAGTATATAGACGAGATATA GC CCGCTGCCTTCGTCCGG  
*teissieri* CAAATC AAATCGGCTTGGAGACAGTATATAGACGAGATATA A T CCGCTGCCTTCGTCCGG

Y11 optic lobe enhancer end  
*sanotmea* G TCGCTGCCCATTCGGAGCTGGGTTAACTAGTTTCGAGTT S# - *santomea*-specific mutation  
*yakuba* G TCGCTGCCCATTCGGAGCTGGGTTAACTAGTTTCGAGTT Y# - *yakuba*-specific mutation  
*teissieri* G CGCTGCCCATTCG CAGCTGGGTTAACTAGTTTCGAGTT

**Figure S11. Alignment of the optic lobe enhancer from *D. santomea* with *D. yakuba* and *D. teissieri* sequences.** Arrows denote primers used to amplify enhancers. *D. santomea*-specific mutations are marked with an S, and *D. yakuba*-specific mutations are marked with a Y.

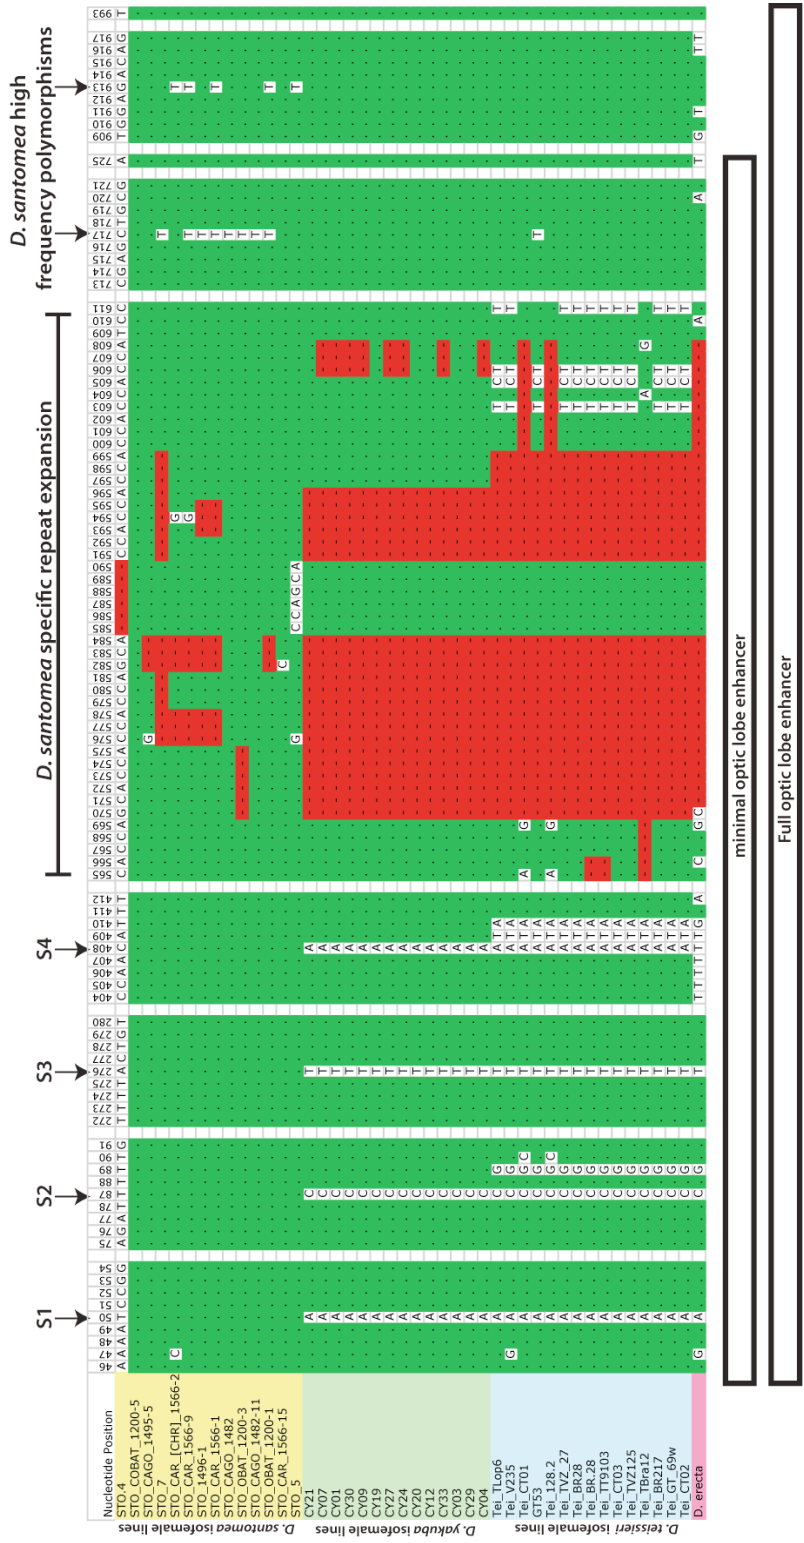

**Figure S12. Alignment of isofemale lines.** The flanking sequence surrounding each *D. santomea*-specific substitution (S1-S4), and other high frequency polymorphisms in *D. santomea* are given. Numbers indicate the position of each feature in the context of the *D. santomea* optic lobe enhancer shown in Fig. S11.



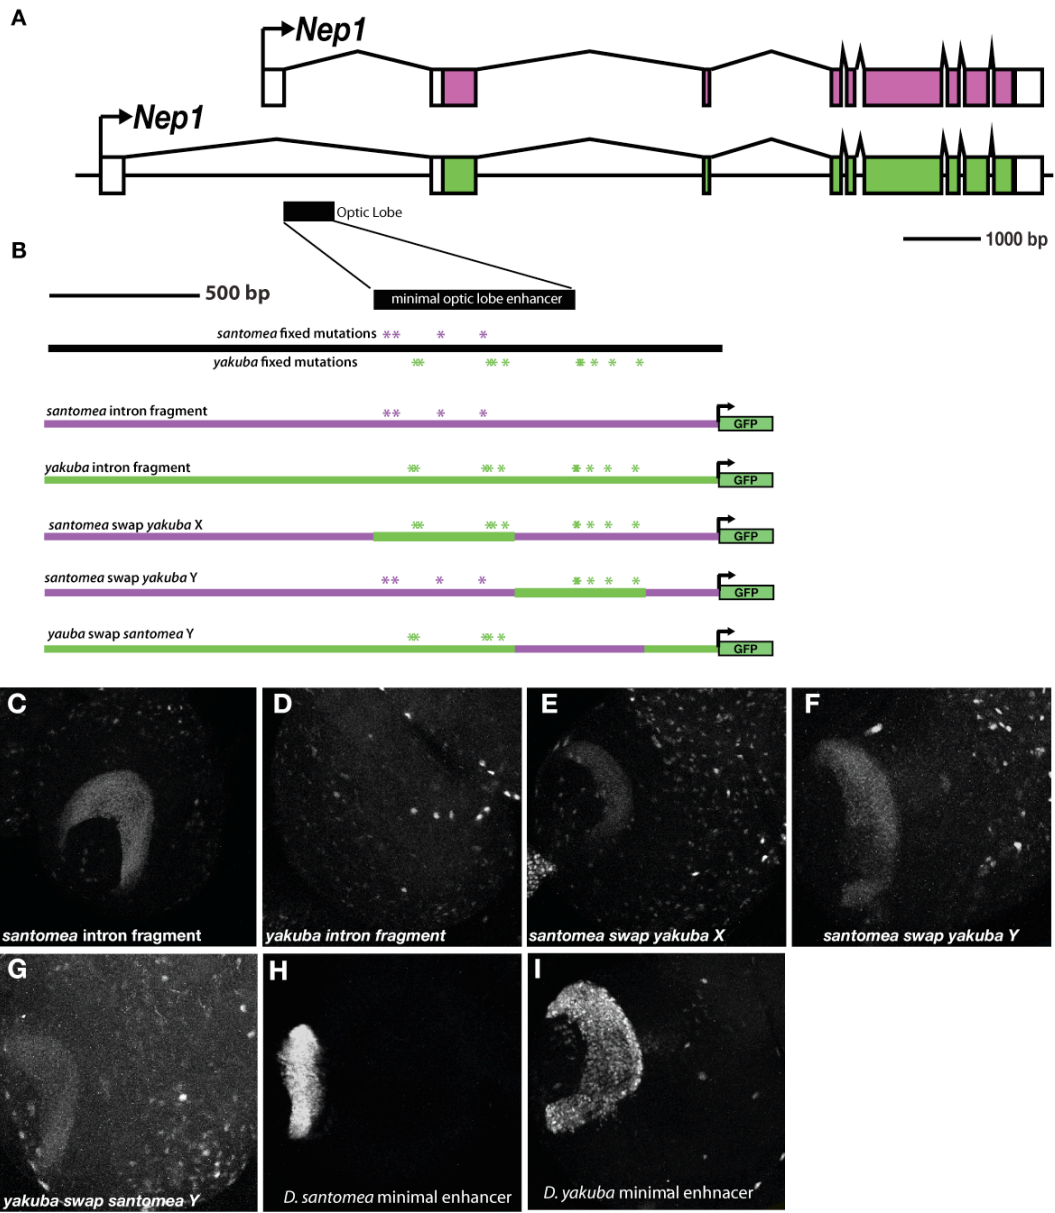

**Figure S13. The loss of optic lobe activity in *D. yakuba* is due in part to the gain of repressive inputs.** (A) Schematic of the *Nep1* gene, indicating the position of the minimal optic lobe enhancer. (B) Schematic of chimeric reporter constructs that combine different *yakuba* and *santomea* intron regions, within and adjacent to the optic lobe enhancer. (C) The *D. santomea* intron fragment drives optic lobe activity, and yet the orthologous region from *D. yakuba* does not (D). Upon swapping in the “X” fragment, which contains all four *santomea*-specific mutations, the optic lobe activity is strongly reduced (E). Swapping the “Y” fragment from *yakuba* into the *santomea* intron fragment causes a slight reduction in activity (F). Surprisingly, the reciprocal construct, in which the *santomea* “Y” fragment (which contains no derived mutations) is swapped into the *yakuba* intron fragment exhibits weak optic lobe activity (G, detected with greatly increased gain), suggesting that mutations in this region repress the activity of the minimal enhancer in *D. yakuba*. Consistent with this hypothesis, the minimal optic lobe enhancer of *D. yakuba* (I) is sufficient to drive optic lobe expression, though at reduced levels in comparison to the *D. santomea* minimal fragment (H).

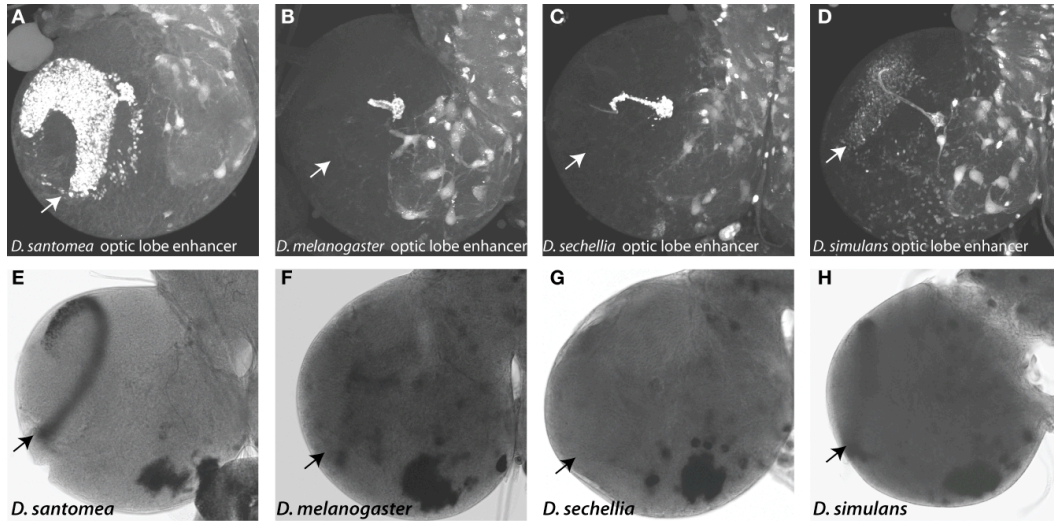

**Figure S14. The potential to evolve optic lobe expression of *Nep1* has persisted for >10 million years.** (A-D) Comparison of *D. santomea* optic lobe enhancer activity (A) to that of melanogaster complex species (B-D). (E-H) *Nep1* expression in optic lobes treated with high proteinase K to detect trace levels of expression. (A, E) *D. santomea* exhibits both strong optic lobe enhancer activity (A, arrow), and expression of *Nep1* in the optic lobes (E, arrow). *D. melanogaster* (B, F), and *D. sechellia* (C,G) have no detectible enhancer activity or optic lobe expression (arrows). The *D. simulans* optic lobe enhancer has weak activity in the laminar neuroblasts (D, arrow), a pattern that recapitulates the weak endogenous *Nep1* expression in the optic lobes (H, arrow).

**Table S1. Summary of pattern changes**

| <b>Gene</b>    | <b>Leg</b> | <b>Wing</b> | <b>Antenna</b> | <b>Eye</b> | <b>Brain</b> |
|----------------|------------|-------------|----------------|------------|--------------|
| <b>CG14534</b> |            |             | A, B           | A, B       |              |
| <b>Gld</b>     | B          | A           |                |            |              |
| <b>Nep-1</b>   | A, B       | B           | A, B, C        | A, B       | B, C         |
| <b>Obp56d</b>  |            | C           |                | B          |              |
| <b>Obp99a</b>  |            |             |                | A, B       | A, B         |

A = domain/intensity shift (8 total)

B = heterochrony/loss (10 total)

C = apparent gain (3 total)

**Table S2. Species used in the study**

| <b>Species</b>          | <b>UCSD Stock Number / Stock Origin</b> |
|-------------------------|-----------------------------------------|
| <i>D. melanogaster</i>  | yw stock                                |
| <i>D. simulans</i>      | 14021-0251.165                          |
| <i>D. mauritiana</i>    | 14021-0241.01                           |
| <i>D. sechellia</i>     | Cousin Island                           |
| <i>D. yakuba</i>        | 14021-0261.01                           |
| <i>D. santomea</i>      | 14021-0271.00                           |
| <i>D. teissieri</i>     | 14021-0257.00                           |
| <i>D. erecta</i>        | 14021-0224.01                           |
| <i>D. suzukii</i>       | 14023-0311.00                           |
| <i>D. kikkawai</i>      | Gift from Artyom Kopp                   |
| <i>D. jambulina</i>     | NH0115                                  |
| <i>D. ananassae</i>     | 14024-0371.13                           |
| <i>D. pseudoobscura</i> | 14011-0121.87                           |

**Table S3. Primers for generating riboprobes**

| <b>Gene</b> | <b>Species</b>          | <b>Forward Primer</b>                        | <b>Reverse Primer</b>                          |
|-------------|-------------------------|----------------------------------------------|------------------------------------------------|
| CG17278     | <i>D. melanogaster</i>  | athtagtgacactatagaTCGTGCGCGAATTAATCTACAACG   | taatcgactcactataggACTGGCCAACAATACTGCTGAGAGC    |
| CG5758      | <i>D. melanogaster</i>  | athtagtgacactatagaTATGTAAGCTTCTCGCCGAAAAC    | taatcgactcactataggATCGTCGATGAACCGGTAGACCTGCT   |
| Doc2        | <i>D. melanogaster</i>  | athtagtgacactatagaGAGTCTGACATGTCGCCAACGAAAGG | taatcgactcactataggCCGATATGCTGAAGCCCTTGCTCCTT   |
| CG10275     | <i>D. melanogaster</i>  | athtagtgacactatagaGGGAGATTCTGCTGACCAGCGATGTA | taatcgactcactataggCTCGTGGATTCCGGTATCGTCATGGCA  |
| Chn         | <i>D. melanogaster</i>  | athtagtgacactatagaAAATGGACGCCATTAGTCGCAACACC | taatcgactcactataggGCTGAACCTTTGGAGCAATGGTCAGG   |
| CG8483      | <i>D. melanogaster</i>  | athtagtgacactatagaTGGCAATGTGGTGGGTACAATCCCT  | taatcgactcactataggCAGGTTAGAAGGCTCCATCCAGACT    |
| CG14534     | <i>D. melanogaster</i>  | athtagtgacactatagaGCGATCCAGTCCAACCCGAATACCGA | taatcgactcactataggCGATAACTAAGGCTAGCTCGCAGTGA   |
| Tsp         | <i>D. melanogaster</i>  | athtagtgacactatagaTTCTTCTGGACCCGAAACAGCAG    | taatcgactcactataggTCCATCTGGGTGTACAGCTTGCCAG    |
| CG14301     | <i>D. melanogaster</i>  | TACTGCGACATCGATGGACGAC                       | TCAGGTGAAGATGCTCTCGACC                         |
| tup         | <i>D. melanogaster</i>  | ATCGAACCGAATCTAATCCAGC                       | AACATCCTTGGTACACTTCGTC                         |
| Pdm2        | <i>D. melanogaster</i>  | ACTGCGAGATGCCACAGAATCT                       | GGGCACAACAGATACACACGTA                         |
| cyp310a1    | <i>D. melanogaster</i>  | athtagtgacactatagaCTCGGAAAAGGCCGGCATTACGTGGA | taatcgactcactataggACTTTCTGGACCTGCCCGAACATCTC   |
| CG8780      | <i>D. melanogaster</i>  | CAGCAGCGTTGCCGTTTCGATG                       | CAGCGTTGTGACTGGTGGCAA                          |
| CG9008      | <i>D. melanogaster</i>  | TGCTATCAGATTATCATCGAGGGCAATG                 | CTGTGAAATATTTGTAATCTGCAAAG                     |
| Obp56a      | <i>D. melanogaster</i>  | TCCCTTAATCTGAGCGACGAGCAG                     | AACTTCTTAGGCCTTAGCCTCGG                        |
| Obp56d      | <i>D. melanogaster</i>  | athtagtgacactatagaGAGGGAATCACCAAGGATCAGGCGAT | taatcgactcactataggGATGTGGGCGCGATTCTTGTAGTAGCAC |
| Obp56d      | <i>D. yakuba</i>        | athtagtgacactatagaGAACTACAATTTTCGGATGAGCAG   | taatcgactcactataggCACACAATAAAATAGCGTTCTGTTGG   |
| ana         | <i>D. melanogaster</i>  | GACATCTTCTCAACGGTAGCA                        | CAAAATGCACCTAGTAGGTATGG                        |
| ana         | <i>D. yakuba</i>        | CTCCATGAAGAGCACCTACAACAC                     | GCGGTTTACTGGATGAACATGTC                        |
| Gld         | <i>D. melanogaster</i>  | TACAACGACGTGCTCCGTTCT                        | CAACGCGGTGTGCTAGAGTGA                          |
| Gld         | <i>D. yakuba</i>        | ACGGAATGATGTATATCCCGGGCA                     | AGATAACTGGATGGAGATTGCGC                        |
| Obp99a      | <i>D. melanogaster</i>  | GCCGACTATGTGGTGAAGAACC                       | TTTTTCCCACTGAATCGAGAA                          |
| Obp99a      | <i>D. yakuba</i>        | TGTGGTGAAGAACCAGAACGACAT                     | TATCAGTCCATGCGCCCAACTAAG                       |
| Obp99a      | <i>D. ananassae</i>     | GTTATAGGCCTCGGCTGATTACGT                     | GCCAGGCTCTTTTGTATCTGCTCC                       |
| Obp99a      | <i>D. pseudoobscura</i> | TATCGGACGAGTGCCTCAAGGAA                      | TGGGGCCAGGCTCTTCTGGATCTT                       |
| Nep1        | <i>D. melanogaster</i>  | TCATCGAGCGGAACTGGAGTCC                       | ATTACGTACTCCTGCTCCAGC                          |
| Nep1        | <i>D. yakuba</i>        | AAATCCGAAAATCGGAACGGGACGA                    | GGATAGCCGATACGCTCGTTCAT                        |
| Nep1        | <i>D. erecta</i>        | AAATCCGAAAATCGGAACGGGACGA                    | GGATAGCCGATACGCTCGTTCAT                        |
| Nep1        | <i>D. ananassae</i>     | AAGCAGGTCCTGAAGTCCCTCGGT                     | TCCAGTTCCGGTGGCATTTCGTGAG                      |
| Nep1        | <i>D. pseudoobscura</i> | CGATCTCTCGGTGGAGAACTGAT                      | CCAATCCTCTGTTTCATAGAGTGC                       |
| Nep1        | <i>D. suzukii</i>       | TACTACCTGAAGGAGAGCAGTG                       | taatcgactcactataggCTGCATCATNTNCCCTCCTGTGTCG    |
| Nep1        | <i>D. kikkawai</i>      | TACTACCTGAAGGAGAGCAGTG                       | taatcgactcactataggCTGCATCATNTNCCCTCCTGTGTCG    |
| Nep1        | <i>D. jambulina</i>     | TACTACCTGAAGGAGAGCAGTG                       | taatcgactcactataggCTGCATCATNTNCCCTCCTGTGTCG    |

Lowercase letters indicate promoter sequences used for *in vitro* transcription. (SP6 on forward primers, T7 on reverse primers). Primers pairs that vector.



**Table S4. Primers for generating reporter constructs**

| <b>Construct</b> | <b>Forward Primer</b>                   | <b>Reverse Primer</b>                   |
|------------------|-----------------------------------------|-----------------------------------------|
| A                | TTCCGggcgcgccTGAACGCACATGCCAAAAGTTTTGCG | TTGCCcctgcaggCATCAGCCTCGATGGCACTGGAAAAA |
| B                | TTCCGggcgcgccGGTGGTGTGCGCACTCTGGG       | TTGCCcctgcaggGAGTTGAGGTCCATGGCCGAGAGCAG |
| C                | TTCCGggcgcgccCGATATACACCATACGAGTACT     | TTGCCcctgcaggACAGCGACTACAAGGAGCTGCT     |
| A.1+             | TTCCGggcgcgccTGAACGCACATGCCAAAAGTTTTGCG | TTGCCcctgcaggACTAAAATAAATTAATGCGAC      |
| A12-OL           | TTCCGggcgcgccTGAACGCACATGCCAAAAGTTTTGCG | TTGCCcctgcaggACTAAAATAAATTAATGCGAC      |
| A.1              | TTCCGggcgcgccTGAACGCACATGCCAAAAGTTTTGCG | TTGCCcctgcaggCAAGTATTGCCAATGGAAGTGACACC |
| A.2              | TTCCGggcgcgccGACACGATGATCAGCACTGATAA    | TTGCCcctgcaggGAGACTAGTAAACCTGTCAA       |
| A.3              | TTCCGggcgcgccAGCTGGGTTAACTAGTTTCGAGTT   | TTGCCcctgcaggCATCAGCCTCGATGGCACTGGAAAAA |
| A.2.1+2          | TTCCGggcgcgccGACACGATGATCAGCACTGATAA    | TTGCCcctgcaggACTAAAATAAATTAATGCGAC      |
| A.2.2+3          | TTCCGggcgcgccGACACGATGATCAGCACTGATAA    | TTGCCcctgcaggCATCAGCCTCGATGGCACTGGAAAAA |
| A.2.1            | TTCCGggcgcgccGACACGATGATCAGCACTGATAA    | TTGCCcctgcaggCAAGTATTGCCAATGGAAGTGACACC |
| A.2.2            | TTCCGggcgcgccCATCTGGCCCCATATTATT        | TTGCCcctgcaggACTAAAATAAATTAATGCGAC      |
| A.2.3            | TTCCGggcgcgccACAACAAAAAGTAATGCACTAAA    | TTGCCcctgcaggGAGACTAGTAAACCTGTCAA       |
| A.2.3.1          | TTCCGggcgcgccACAACAAAAAGTAATGCACTAAA    | TTGCCcctgcaggAACTCGAACTAGTTAACCCAGCT    |
| A.2.3.4          | TTCCGggcgcgccACAACAAAAAGTAATGCACTAAA    | TTGCCcctgcaggTCTTCGAGCTCGCGATCGTTT      |
| A.2.2.4          | TTCCGggcgcgccAGAGAGAGAGCGCCACACTAGC     | TTGCCcctgcaggACTAAAATAAATTAATGCGAC      |

Forward primers contain an *Asc I* site (lowercase), and reverse primers contain a site for *Sbf I* (lowercase) for cloning into the S3AG GFP reporter transformation vector.
